# Supplementary material for: Metal and Ligand Effect on the Structural Diversity of Divalent Coordination Polymers with Mixed Ligands: Evaluation for Photodegradation
Source: MDPI journal article supplement (doi:10.3390/molecules28052226), 2023-02-27
Supplement: s1 [file s1]

# Metal and Ligand Effect on the Structural Diversity of Divalent Coordination Polymers with Mixed Ligands: Evaluation for Photodegradation

Manivannan Govindaraj <sup>1</sup>, Shih-Ying Zhong <sup>1</sup>, Chia-Her Lin <sup>2,\*</sup> and Jhy-Der Chen <sup>1,\*</sup>

<sup>1</sup> Department of Chemistry, Chung-Yuan Christian University, Chung Li, Taoyuan City 320, Taiwan;  
manivannanjent@gmail.com (M.G.); 4ying4ying@gmail.com (S.-Y.Z.)

<sup>2</sup> Department of Chemistry, National Taiwan Normal University, Taipei 106, Taiwan

\* Correspondence: chiaher@ntnu.edu.tw (C.-H.L.); jdchen@cycu.edu.tw (J.-D.C.); Tel.: +886-3-265-3351 (J.-D. C.)

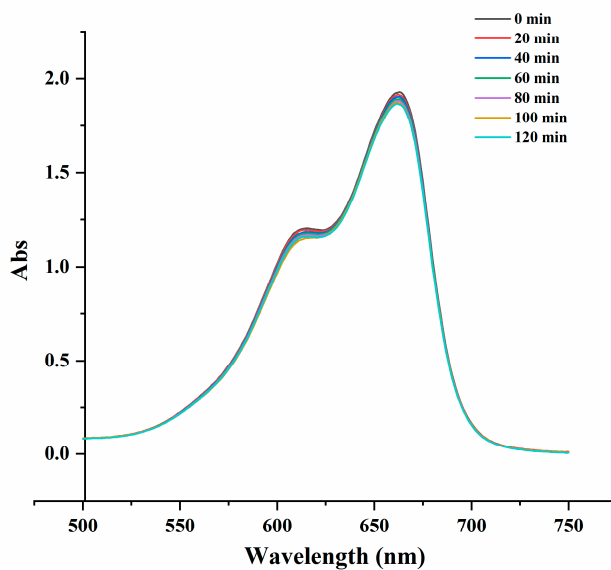

**Figure S1.** UV-vis spectra of the tube 1.

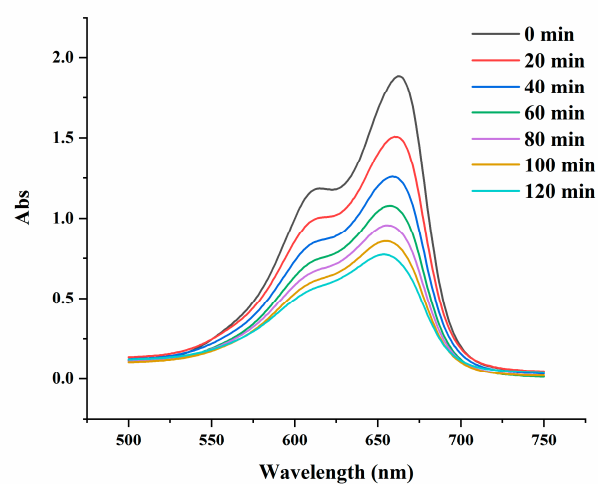

**Figure S2.** UV-vis spectra of the tube 2.

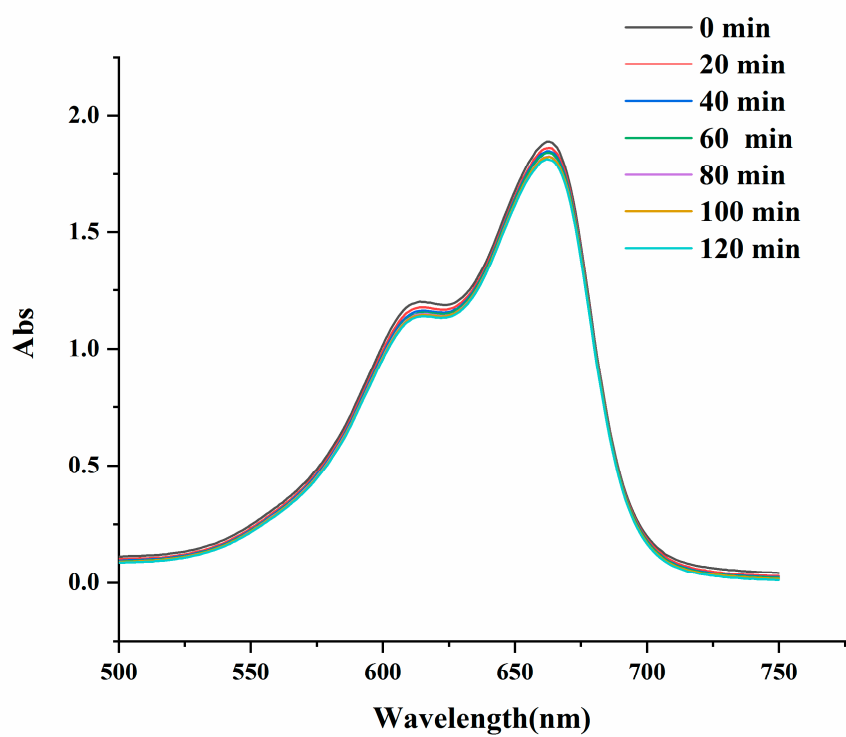

**Figure S3.** UV-vis spectra of tube 3 for complex 1.

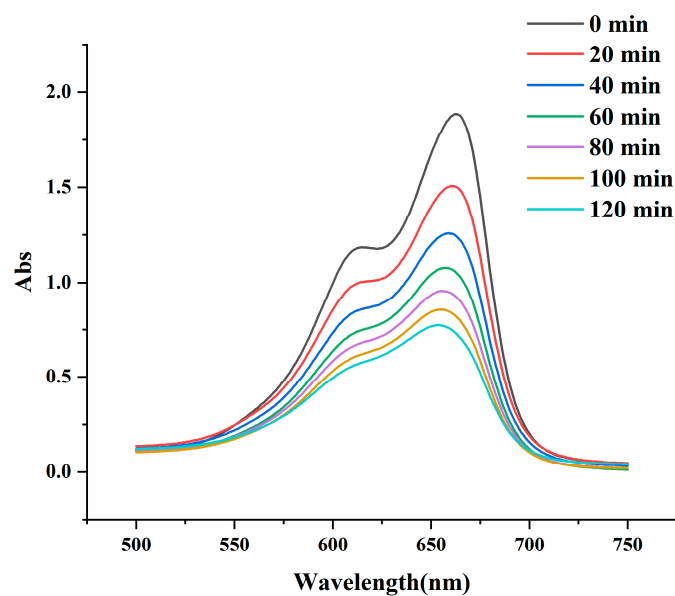

**Figure S4.** UV-vis spectra of tube 4 for complex 1.

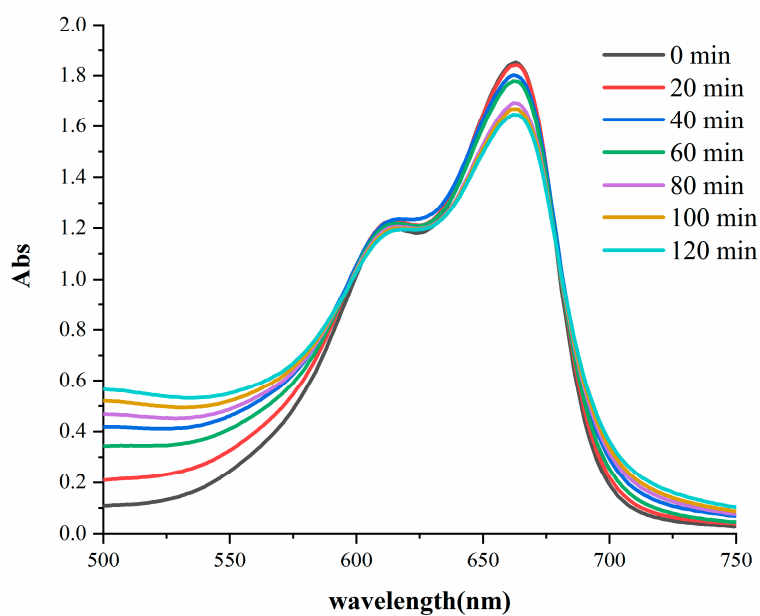

**Figure S5.** The UV-vis spectra of tube 3 for complex 2.

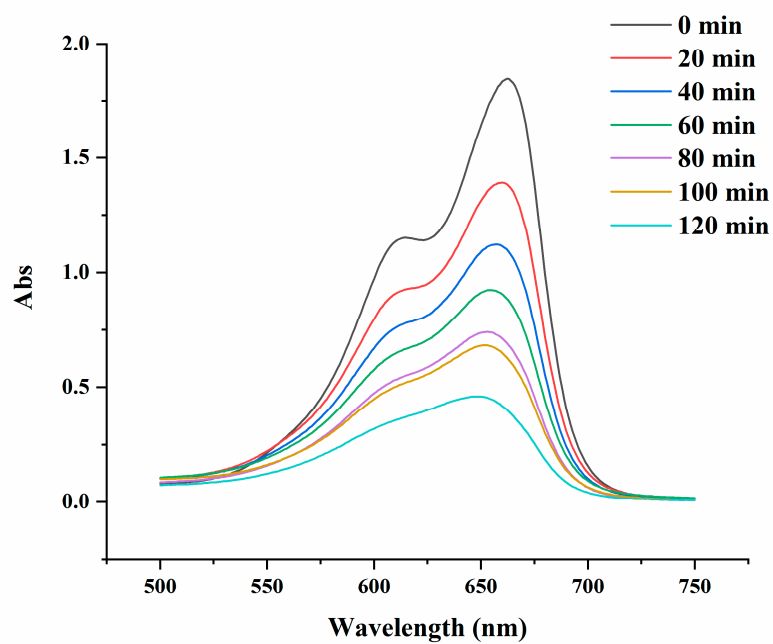

**Figure S6.** UV-vis spectra of tube 4 for complex 2.

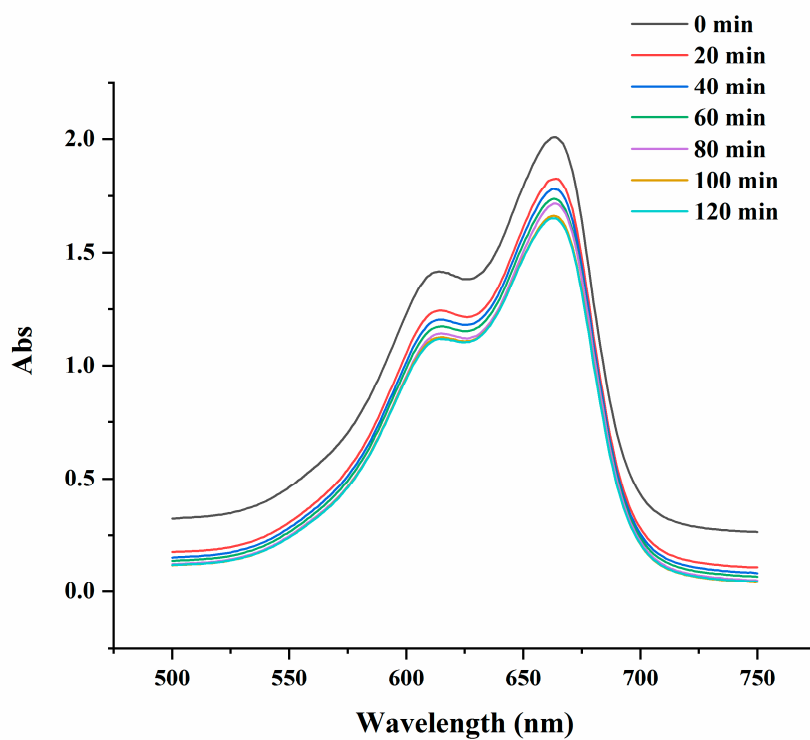

**Figure S7.** UV-vis spectra of tube 3 for complex 3.

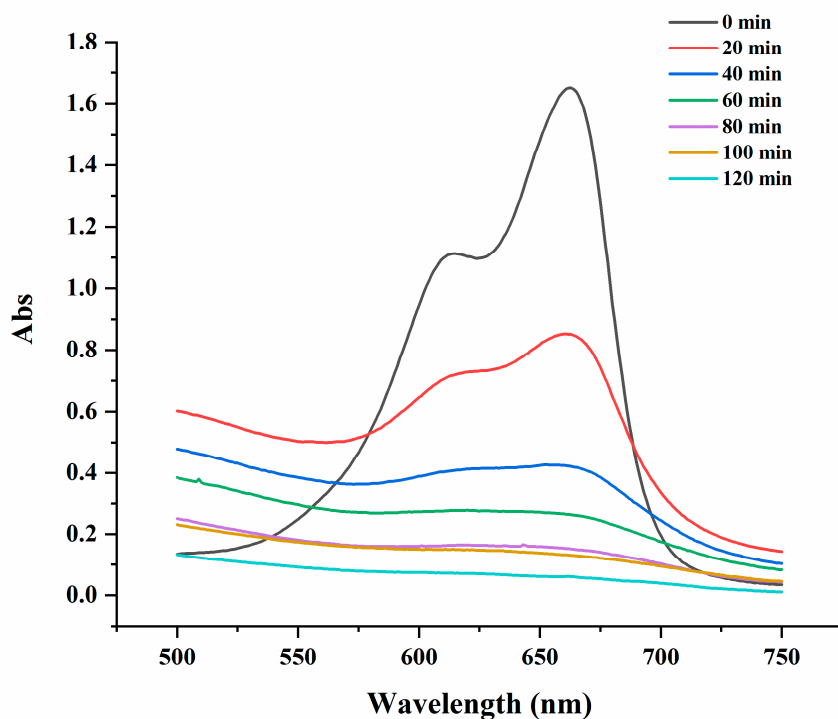

**Figure S8.** UV-vis spectra of tube 3 for complex **3**.

**Table S1.** Degradation efficiency (DE) with the mean values and standard deviations for MB solution under catalytic experiment.

| Time interval | 1 <sup>st</sup> | 2 <sup>nd</sup> | 3 <sup>rd</sup> | Mean   | Standard deviation |
|---------------|-----------------|-----------------|-----------------|--------|--------------------|
| 0             | 100.00          | 100.00          | 100.00          | 100.00 | 0                  |
| 20            | 99.09           | 99.17           | 99.32           | 99.20  | 0.12               |
| 40            | 98.88           | 98.76           | 98.91           | 98.85  | 0.08               |
| 60            | 98.13           | 98.08           | 98.33           | 98.18  | 0.13               |
| 80            | 97.44           | 97.56           | 97.71           | 97.57  | 0.13               |
| 100           | 96.91           | 96.94           | 97.55           | 97.13  | 0.36               |
| 120           | 96.86           | 96.58           | 97.45           | 96.96  | 0.44               |
| DE            | 3.14            | 3.42            | 2.55            | 3.04   |                    |

**Table S2.** Degradation efficiency (DE) with the mean values and standard deviations for MB solution + H<sub>2</sub>O<sub>2</sub> under catalytic experiment.

| Time interval | 1 <sup>st</sup> | 2 <sup>nd</sup> | 3 <sup>rd</sup> | Mean   | Standard deviation |
|---------------|-----------------|-----------------|-----------------|--------|--------------------|
| 0             | 100.00          | 100.00          | 100.00          | 100.00 | 0                  |
| 20            | 82.80           | 83.94           | 87.24           | 84.66  | 2.31               |
| 40            | 70.34           | 73.39           | 76.44           | 73.39  | 3.05               |
| 60            | 60.91           | 64.79           | 67.30           | 64.34  | 3.22               |
| 80            | 53.66           | 59.00           | 63.03           | 58.56  | 4.70               |
| 100           | 47.14           | 52.81           | 56.20           | 52.05  | 4.58               |
| 120           | 41.49           | 47.19           | 50.92           | 46.53  | 4.75               |
| DE            | 58.51           | 52.81           | 49.08           | 53.47  |                    |

**Table S3.** Degradation efficiency (DE) with the mean values and standard deviations for complex 1 under catalytic experiment.

| Time interval | 1 <sup>st</sup> | 2 <sup>nd</sup> | 3 <sup>rd</sup> | Mean   | Standard deviation |
|---------------|-----------------|-----------------|-----------------|--------|--------------------|
| 0             | 100.00          | 100.00          | 100.00          | 100.00 | 0.00               |
| 20            | 97.65           | 98.09           | 97.03           | 97.59  | 0.53               |
| 40            | 96.08           | 96.96           | 95.85           | 96.30  | 0.58               |
| 60            | 95.20           | 96.91           | 95.65           | 95.92  | 0.89               |
| 80            | 94.36           | 95.87           | 94.26           | 94.83  | 0.90               |
| 100           | 93.63           | 95.82           | 94.21           | 94.55  | 1.14               |
| 120           | 93.11           | 95.36           | 93.70           | 94.05  | 1.17               |

|    |      |      |      |      |  |
|----|------|------|------|------|--|
| DE | 6.89 | 4.64 | 6.30 | 5.95 |  |
|----|------|------|------|------|--|

**Table S4.** Degradation efficiency (DE) with the mean values and standard deviations for MB solution + complex **1** + H<sub>2</sub>O<sub>2</sub> under catalytic experiment.

| Time interval | 1 <sup>st</sup> | 2 <sup>nd</sup> | 3 <sup>rd</sup> | Mean   | Standard deviation |
|---------------|-----------------|-----------------|-----------------|--------|--------------------|
| 0             | 100.00          | 100.00          | 100.00          | 100.00 | 0                  |
| 20            | 79.21           | 79.64           | 80.64           | 79.83  | 0.73               |
| 40            | 67.19           | 65.85           | 66.11           | 66.38  | 0.70               |
| 60            | 57.63           | 55.73           | 57.78           | 57.05  | 1.14               |
| 80            | 49.74           | 48.94           | 49.97           | 49.55  | 0.54               |
| 100           | 44.10           | 43.37           | 44.40           | 43.96  | 0.52               |
| 120           | 38.35           | 38.60           | 38.99           | 38.65  | 0.32               |
| <b>DE</b>     | 61.65           | 61.40           | 61.01           | 61.35  |                    |

**Table S5.** Degradation efficiency (DE) with the mean values and standard deviations for MB solution + complex **2** under catalytic experiment.

| Time interval | 1 <sup>st</sup> | 2 <sup>nd</sup> | 3 <sup>rd</sup> | Mean   | Standard deviation |
|---------------|-----------------|-----------------|-----------------|--------|--------------------|
| 0             | 100.00          | 100.00          | 100.00          | 100.00 | 0.00               |
| 20            | 97.72           | 98.14           | 99.72           | 98.52  | 1.05               |
| 40            | 95.49           | 97.34           | 96.10           | 96.31  | 0.94               |
| 60            | 94.27           | 96.59           | 95.14           | 95.33  | 1.17               |
| 80            | 89.71           | 96.54           | 92.71           | 92.99  | 3.42               |
| 100           | 88.49           | 95.84           | 88.64           | 90.99  | 4.20               |

|     |       |       |       |       |      |
|-----|-------|-------|-------|-------|------|
| 120 | 87.27 | 93.61 | 87.85 | 89.58 | 3.50 |
| DE  | 12.73 | 6.39  | 12.15 | 10.42 |      |

**Table S6.** Degradation efficiency (DE) with the mean values and standard deviations for MB solution + complex **2** + H<sub>2</sub>O<sub>2</sub> under catalytic experiment.

| Time interval | 1 <sup>st</sup> | 2 <sup>nd</sup> | 3 <sup>rd</sup> | Mean   | Standard deviation |
|---------------|-----------------|-----------------|-----------------|--------|--------------------|
| 0             | 100.00          | 100.00          | 100.00          | 100.00 | 0.00               |
| 20            | 72.72           | 74.59           | 75.15           | 74.15  | 1.27               |
| 40            | 56.63           | 59.05           | 61.34           | 59.01  | 2.36               |
| 60            | 45.05           | 47.51           | 50.46           | 47.67  | 2.71               |
| 80            | 35.33           | 37.00           | 41.31           | 37.88  | 3.09               |
| 100           | 33.64           | 27.68           | 29.07           | 30.13  | 3.12               |
| 120           | 20.27           | 21.34           | 25.61           | 22.41  | 2.82               |
| DE            | 79.73           | 78.66           | 74.39           | 77.59  |                    |

**Table S7.** Degradation efficiency (DE) with the mean values and standard deviations for MB solution + complex **3** under catalytic experiment.

| Time interval | 1 <sup>st</sup> | 2 <sup>nd</sup> | 3 <sup>rd</sup> | Mean   | Standard Deviation |
|---------------|-----------------|-----------------|-----------------|--------|--------------------|
| 0             | 100.00          | 100.00          | 100.00          | 100.00 | 0.00               |
| 20            | 99.50           | 90.84           | 90.04           | 93.46  | 5.24               |
| 40            | 89.20           | 88.60           | 87.68           | 88.49  | 0.76               |
| 60            | 87.94           | 86.46           | 86.31           | 86.90  | 0.90               |
| 80            | 86.23           | 84.47           | 85.97           | 85.56  | 0.95               |



|     |       |       |       |       |      |
|-----|-------|-------|-------|-------|------|
| 100 | 85.08 | 82.73 | 84.54 | 84.12 | 1.23 |
| 120 | 84.17 | 82.18 | 84.35 | 83.57 | 1.20 |
| DE  | 15.83 | 17.82 | 15.65 | 16.43 |      |

**Table S8.** Degradation efficiency (DE) with the mean values and standard deviations for MB solution + complex **3** + H<sub>2</sub>O<sub>2</sub> under catalytic experiment.

| Time interval | 1 <sup>st</sup> | 2 <sup>nd</sup> | 3 <sup>rd</sup> | Mean   | Standard Deviation |
|---------------|-----------------|-----------------|-----------------|--------|--------------------|
| 0             | 100.00          | 100.00          | 100.00          | 100.00 | 0.00               |
| 20            | 55.94           | 51.61           | 52.26           | 53.27  | 2.34               |
| 40            | 30.78           | 25.56           | 26.95           | 27.77  | 2.70               |
| 60            | 18.18           | 15.99           | 15.83           | 16.67  | 1.31               |
| 80            | 11.93           | 9.21            | 10.30           | 10.48  | 1.37               |
| 100           | 9.91            | 7.87            | 6.36            | 8.05   | 1.78               |
| 120           | 6.24            | 3.69            | 4.90            | 4.94   | 1.27               |
| DE            | 93.76           | 96.31           | 95.10           | 95.06  |                    |

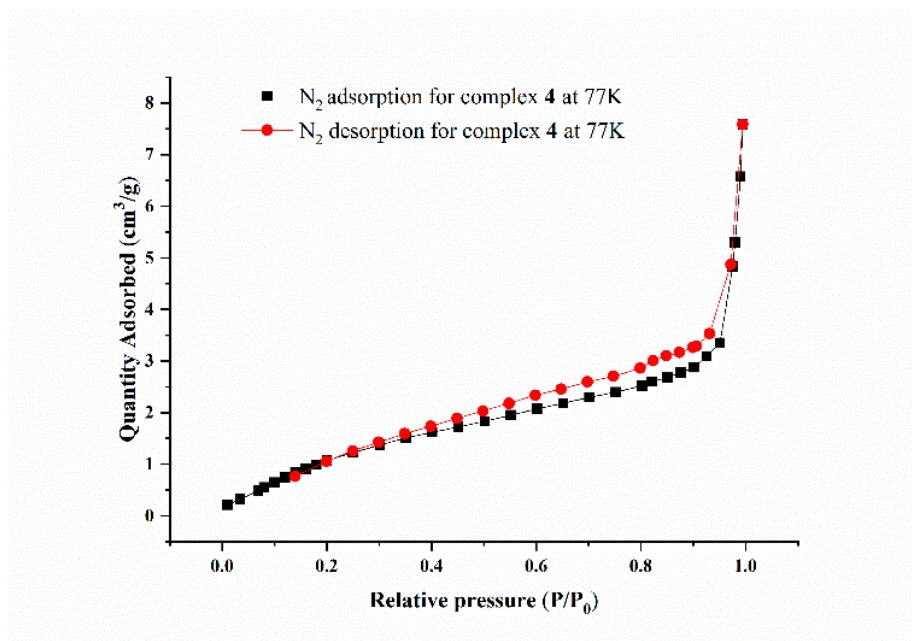

**Figure S9.** N<sub>2</sub> sorption isotherm for complex 1.

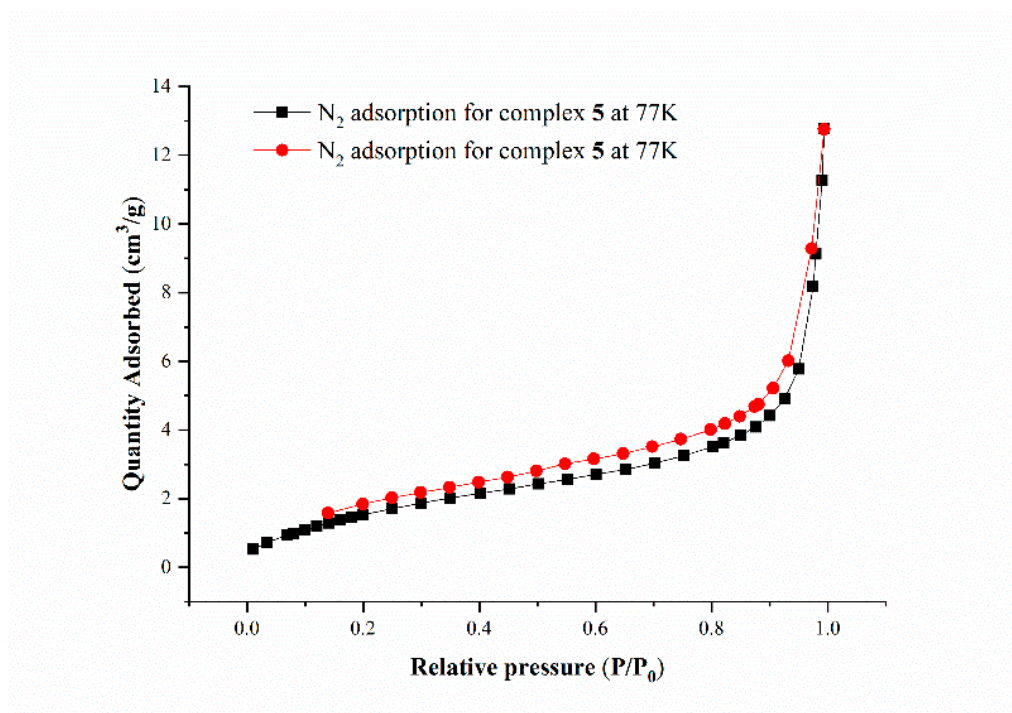

**Figure S10.** N<sub>2</sub> sorption isotherm for complex 2.

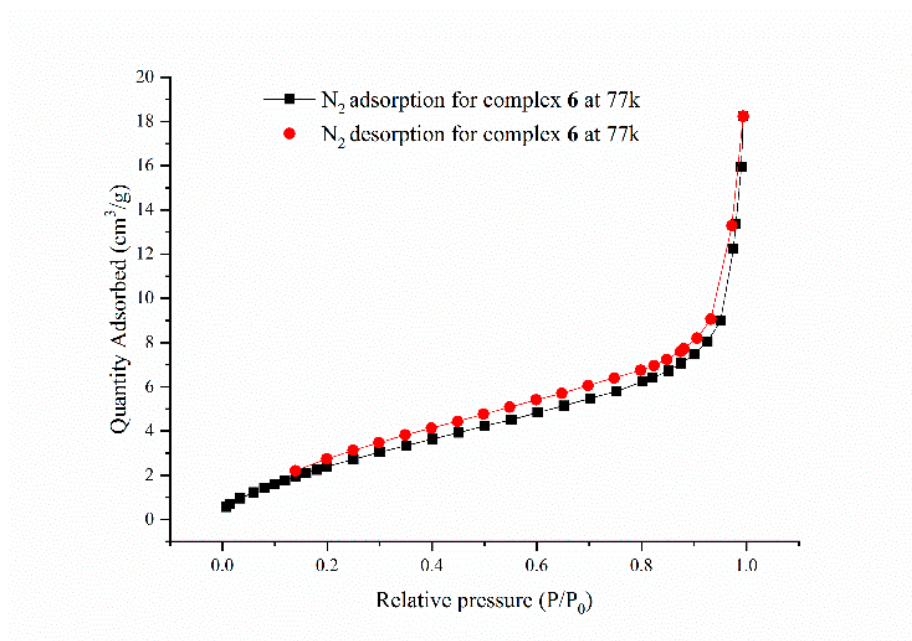

**Figure S11.**  $N_2$  sorption isotherm for complex 3.

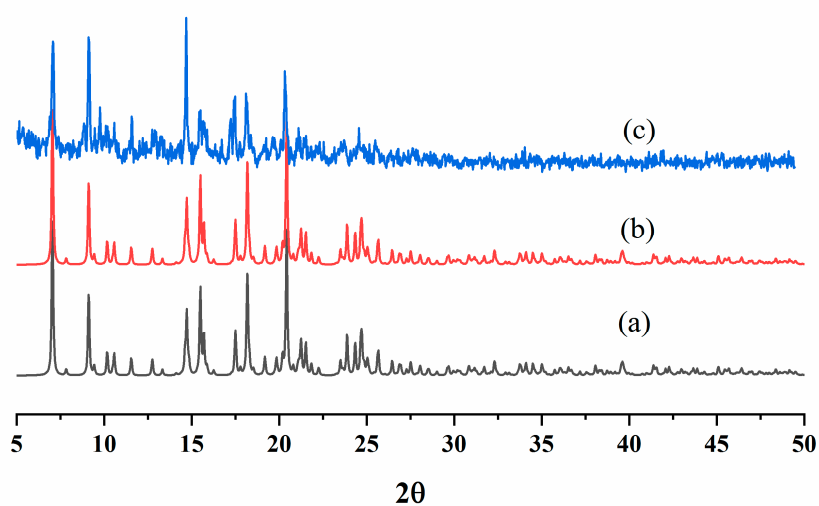

**Figure S12.** The PXRD pattern of 1 (a) simulated from single-crystal X-ray data, (b) as synthesized and (c) after photodegradation experiment.

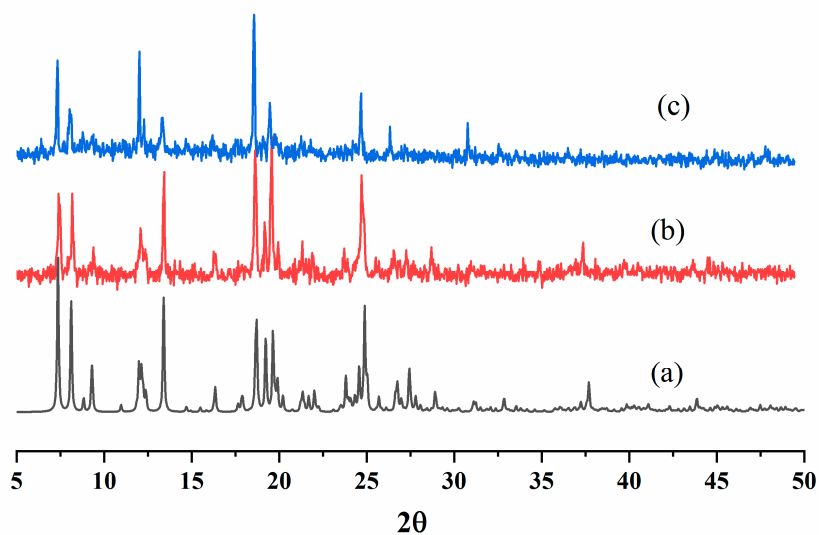

**Figure S13.** The PXRD pattern of **2** (a) simulated from single-crystal X-ray data, (b) as synthesized and (c) after photodegradation experiment.

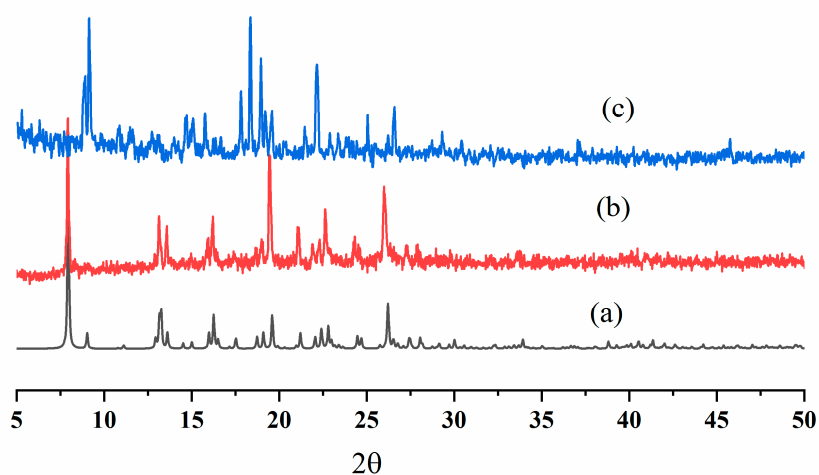

**Figure S14.** The PXRD pattern of **3** (a) simulated from single-crystal X-ray data, (b) as synthesized and (c) after photodegradation experiment.

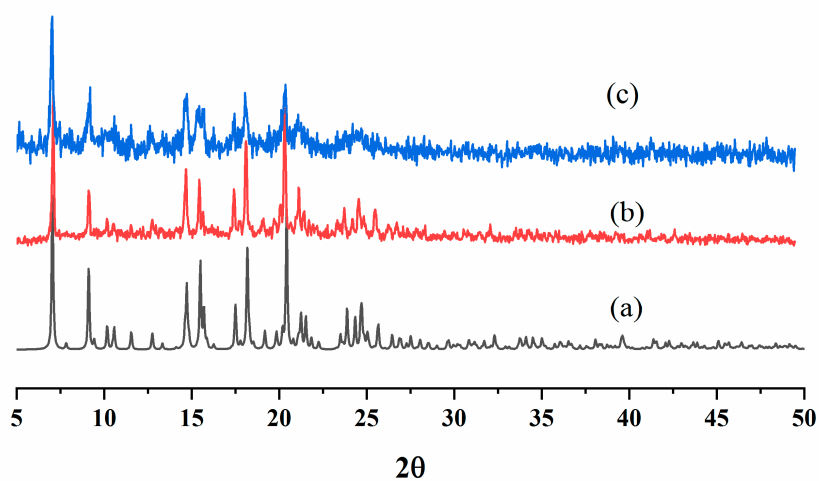

**Figure S15.** The PXRD pattern of **1** (a) simulated from single-crystal X-ray data, (b) as synthesized and (c) after nitrogen adoption experiment.

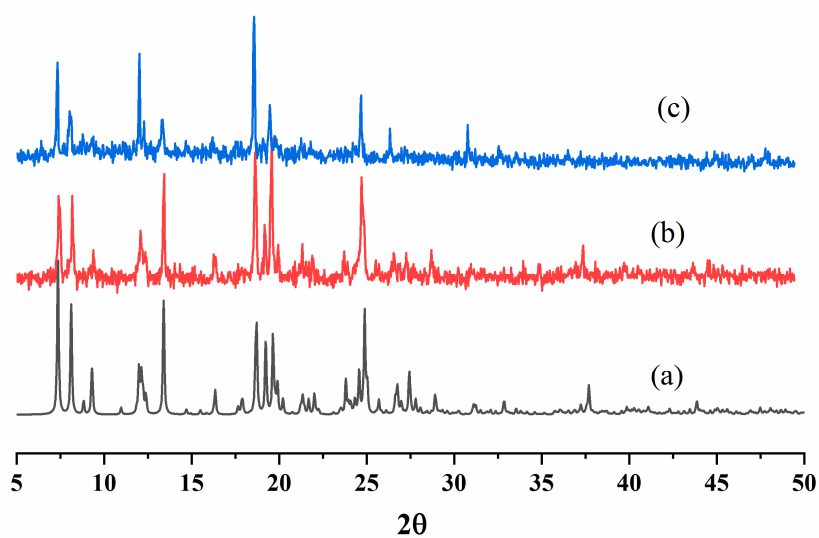

**Figure S16.** The PXRD pattern of **2** (a) simulated from single-crystal X-

ray data, (b) as synthesized and (c) after nitrogen adoption experiment.

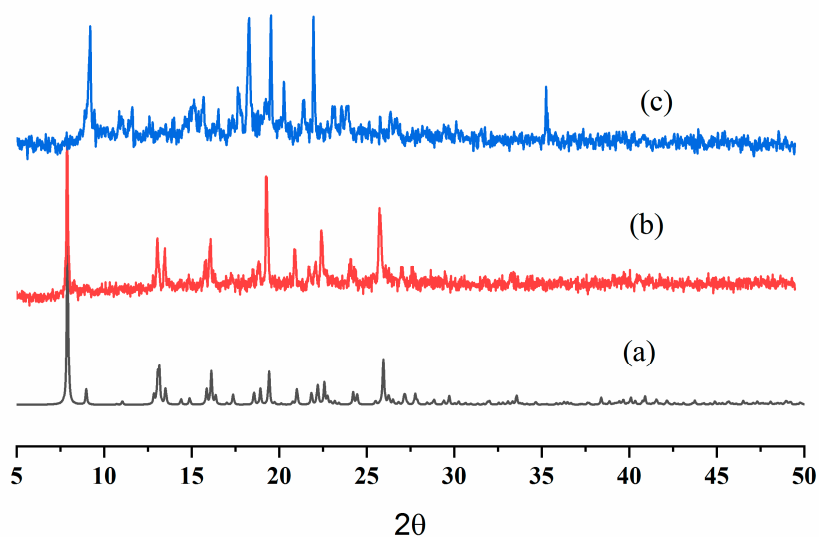

**Figure S17.** The PXRD pattern of **3** (a) simulated from single-crystal X-ray data, (b) as synthesized and (c) after nitrogen adoption experiment.

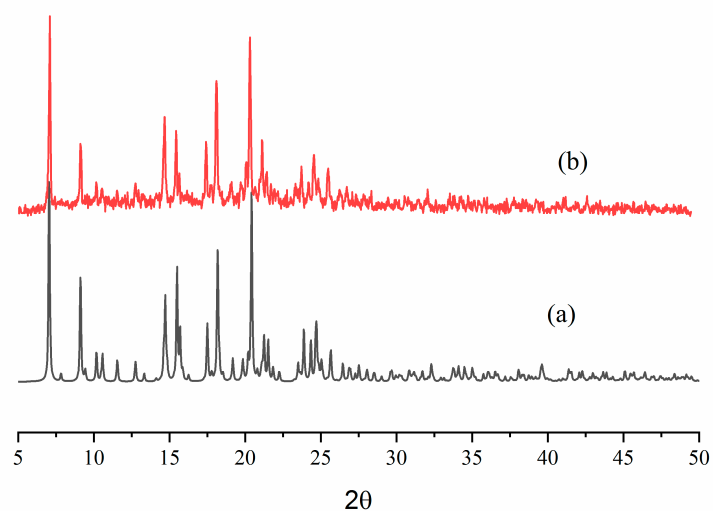

**Figure S18.** The PXRD pattern of (a) simulated from single-crystal x-ray data and (b) bulk materials as synthesized for complex **1**.

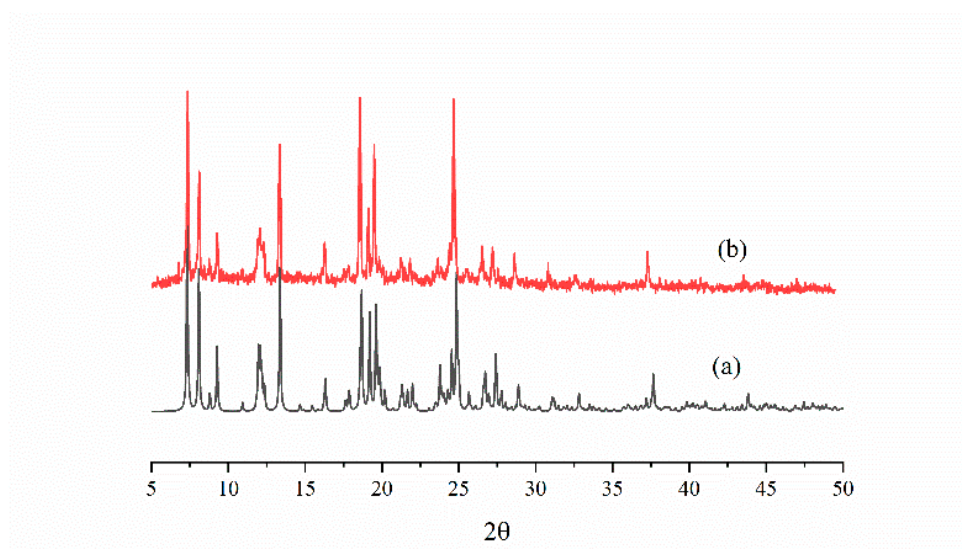

**Figure S19.** The PXRD pattern of (a) simulated from single-crystal x-ray data and (b) bulk materials as synthesized for complex **2**.

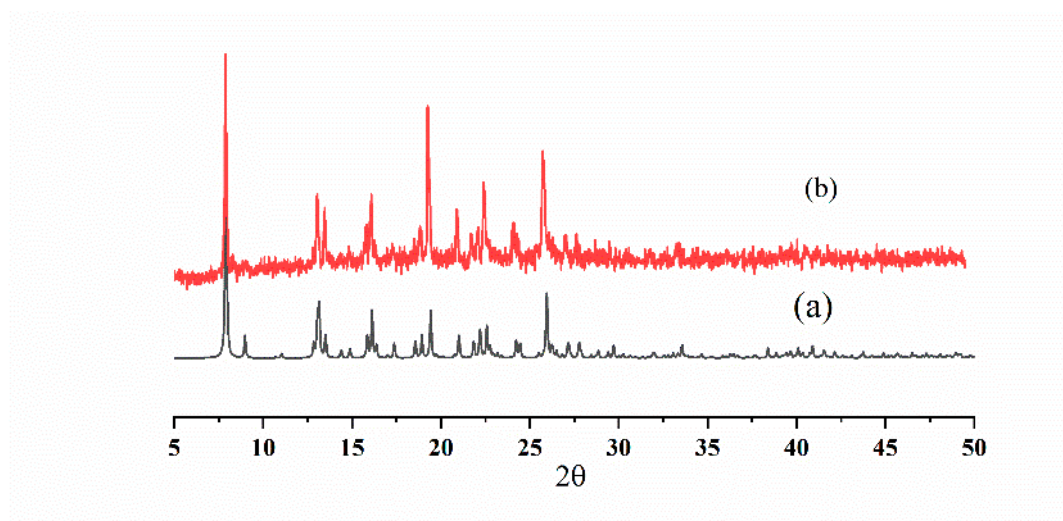

**Figure S20.** The PXRD pattern of (a) simulated from single-crystal x-ray data and (b) bulk materials as synthesized for complex **3**.



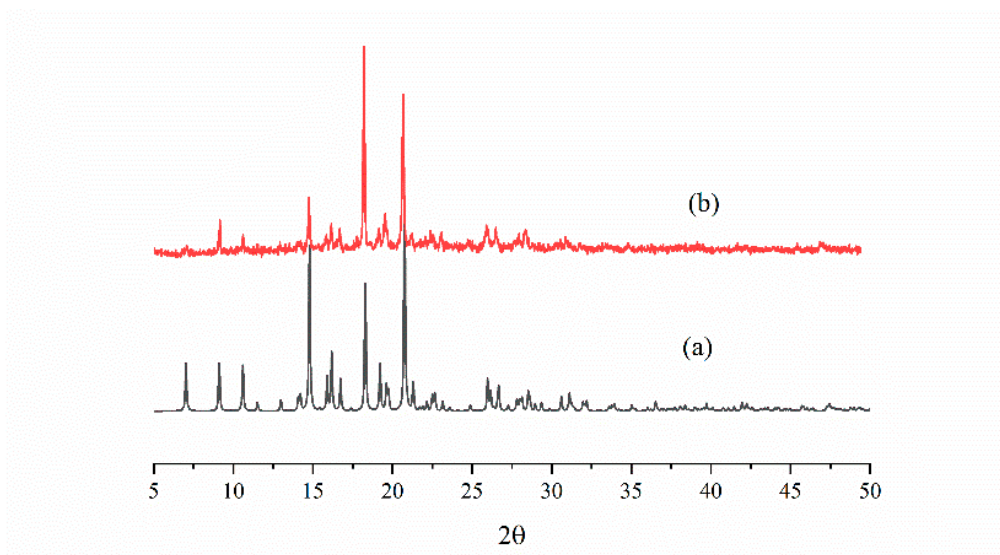

**Figure S21.** The PXRD pattern of (a) simulated from single-crystal x-ray data and (b) bulk materials as synthesized for complex **4**.

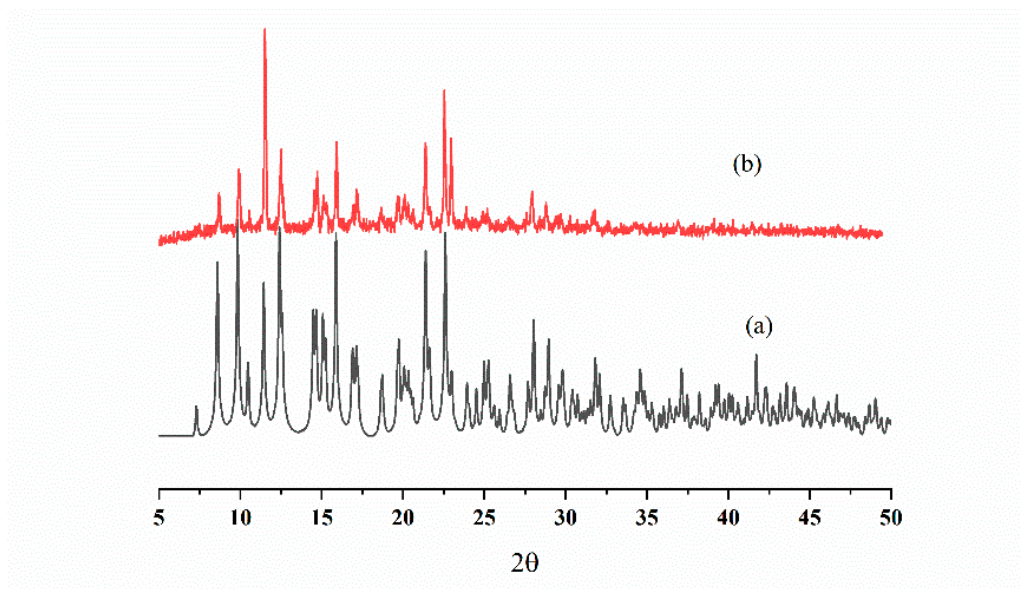

**Figure S22.** The PXRD pattern of (a) simulated from single-crystal x-ray data and (b) bulk materials as synthesized for complex **5**.



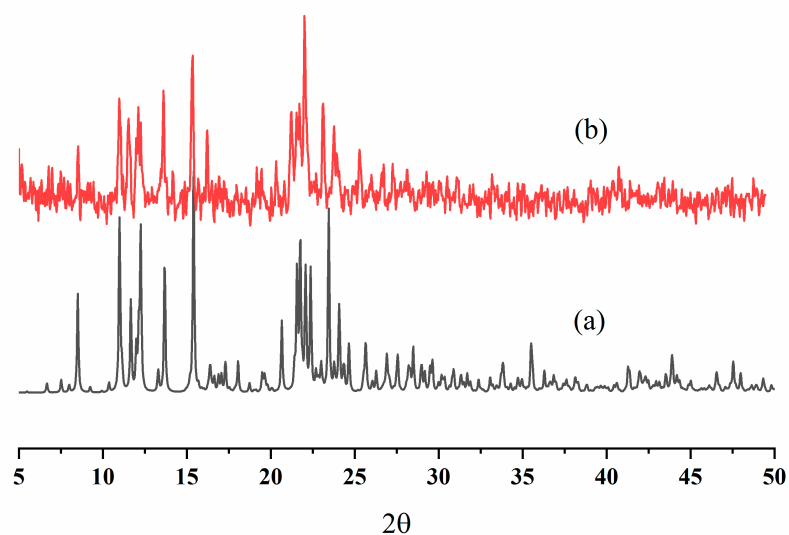

**Figure S23.** The PXRD pattern of (a) simulated from single-crystal x-ray data and (b) bulk materials as synthesized for complex **6**.

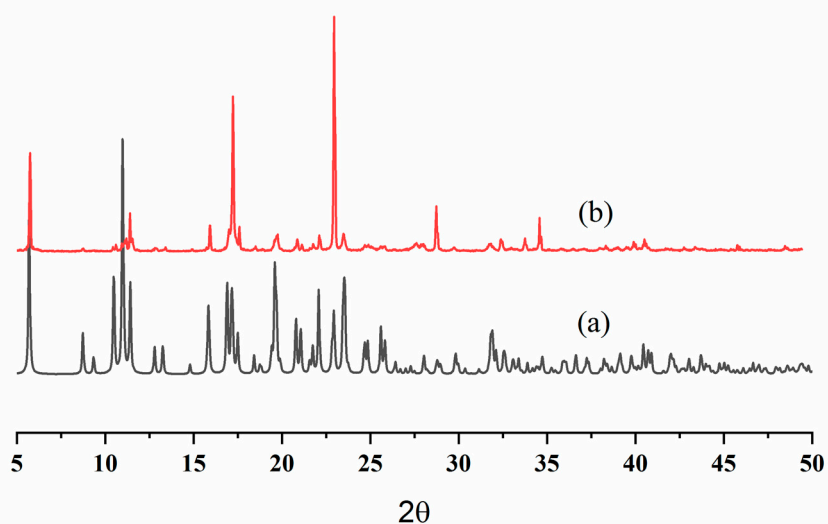

**Figure S24.** The PXRD pattern of (a) simulated from single-crystal x-ray data and (b) bulk materials as synthesized for complex **7**.

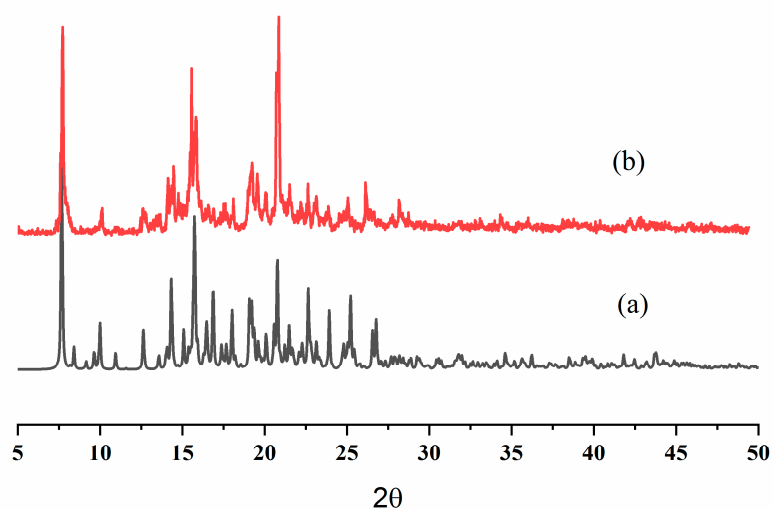

**Figure S25.** The PXRD pattern of (a) simulated from single-crystal x-ray data and (b) bulk materials as synthesized for complex **8**.

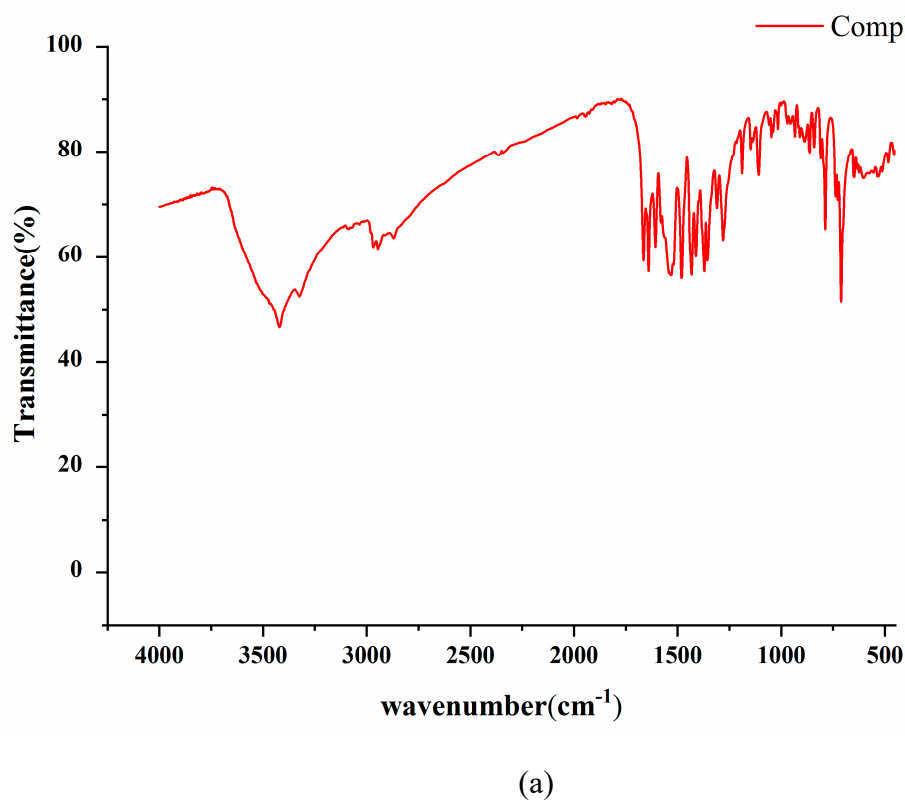

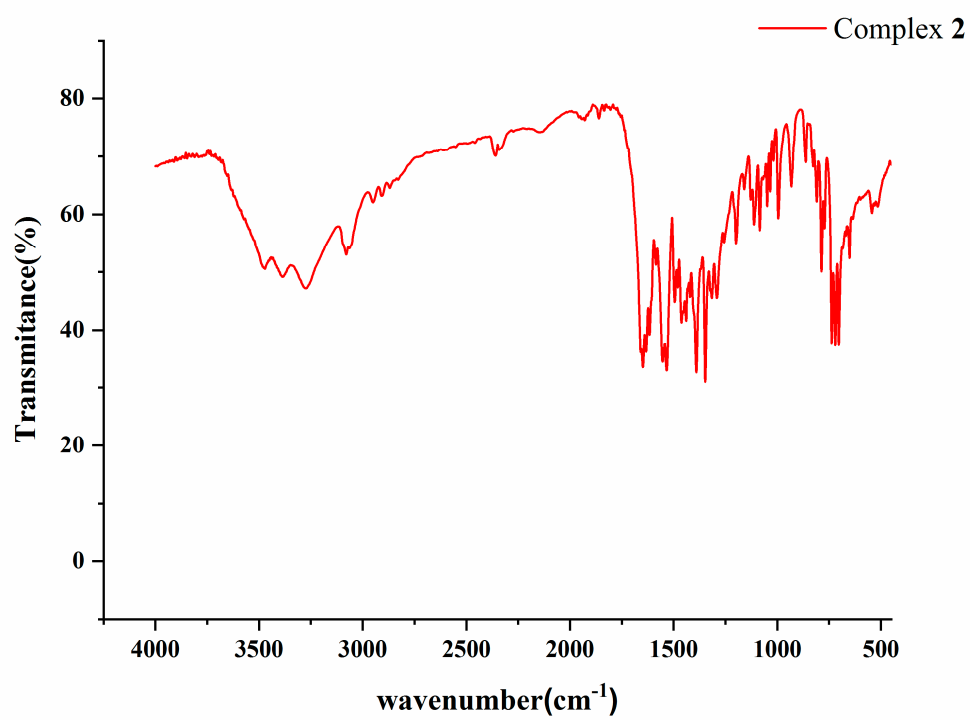

(b)

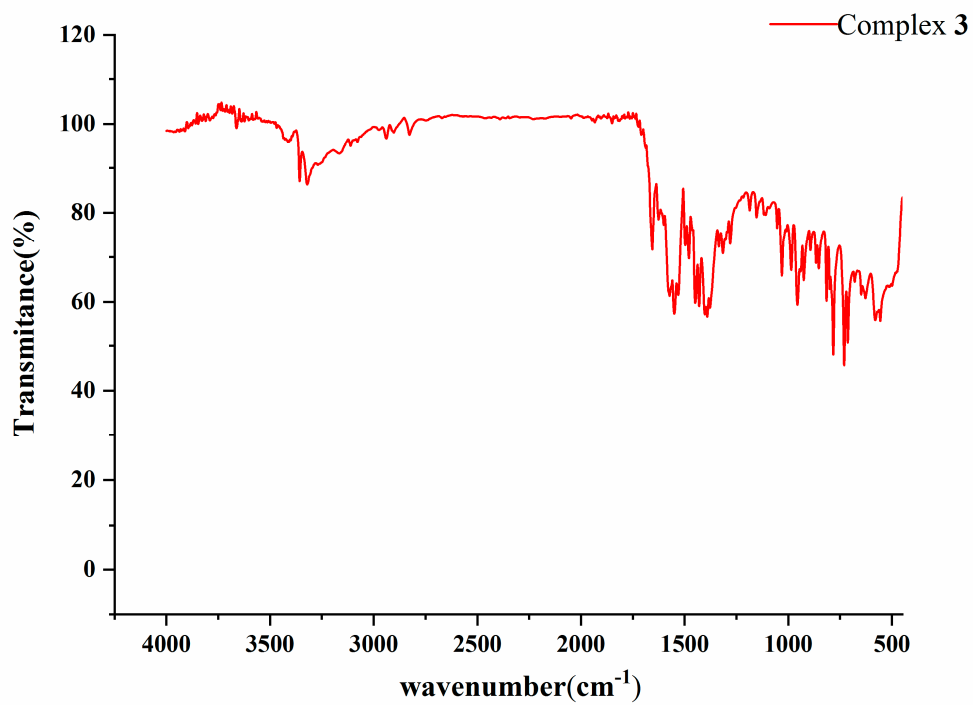

(c)

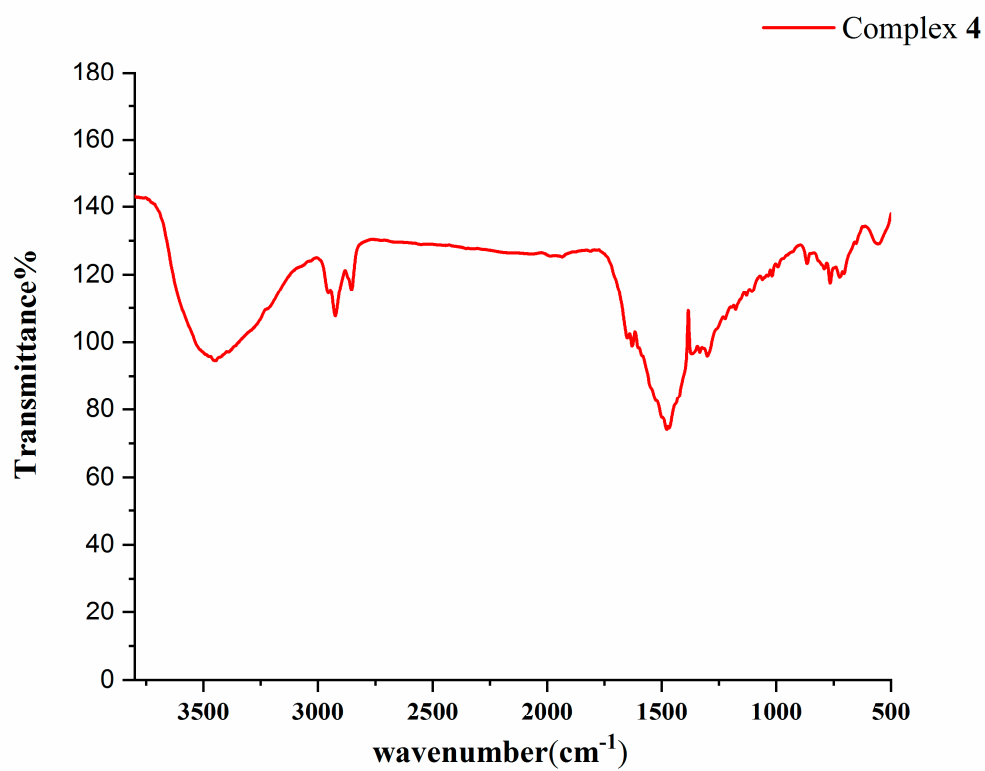

(d)

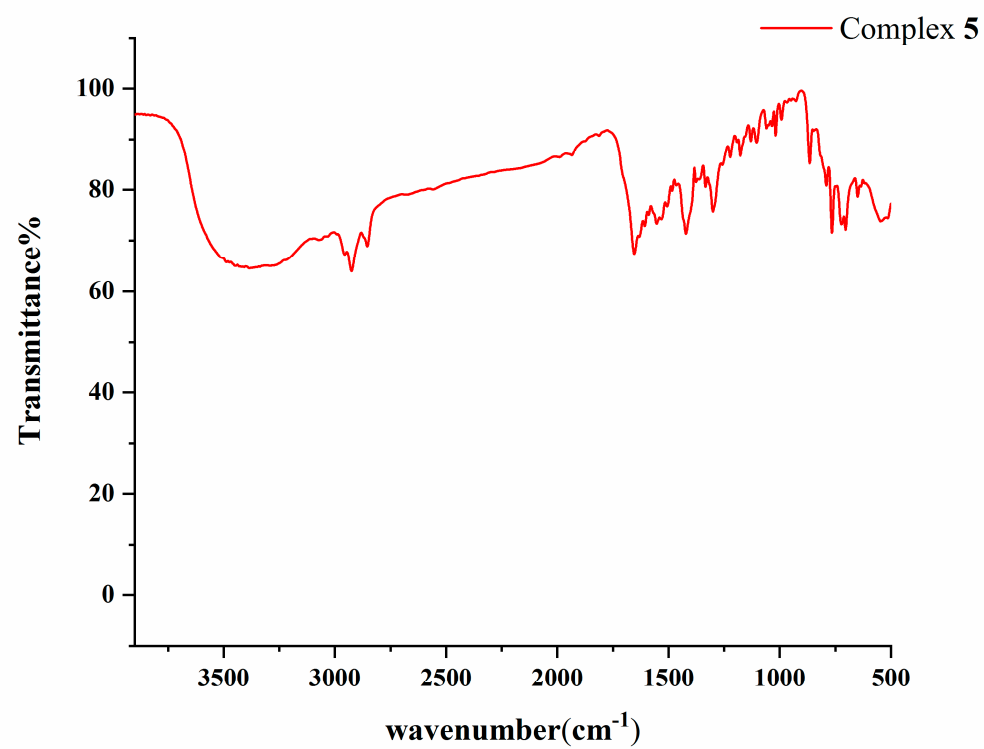

(e)

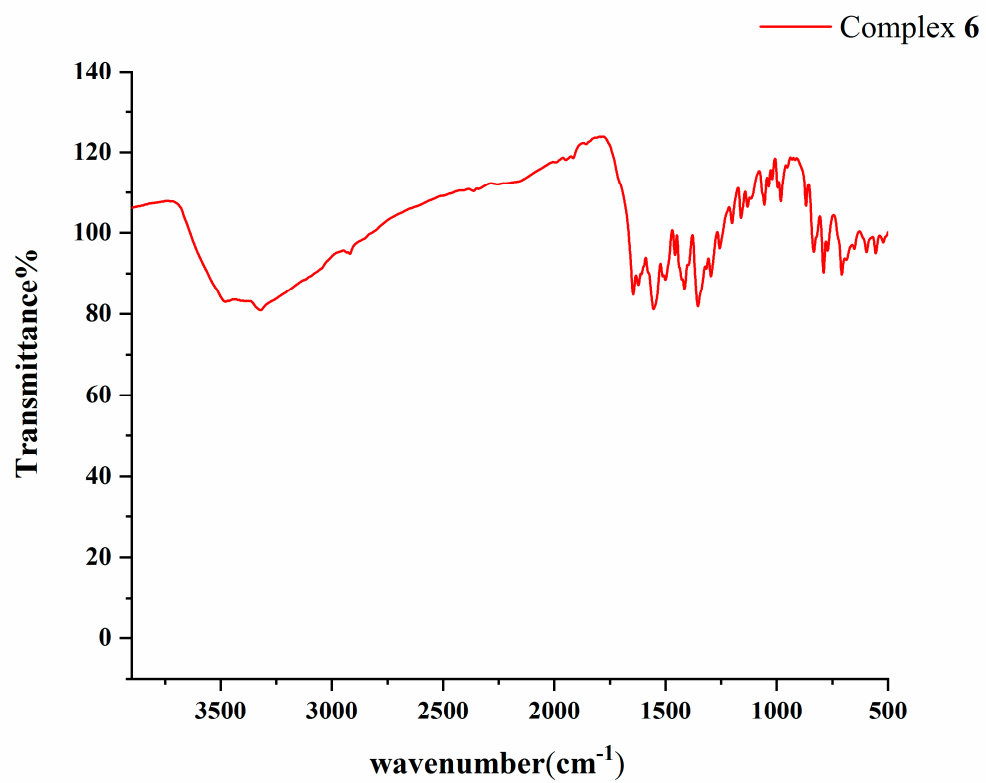

(f)

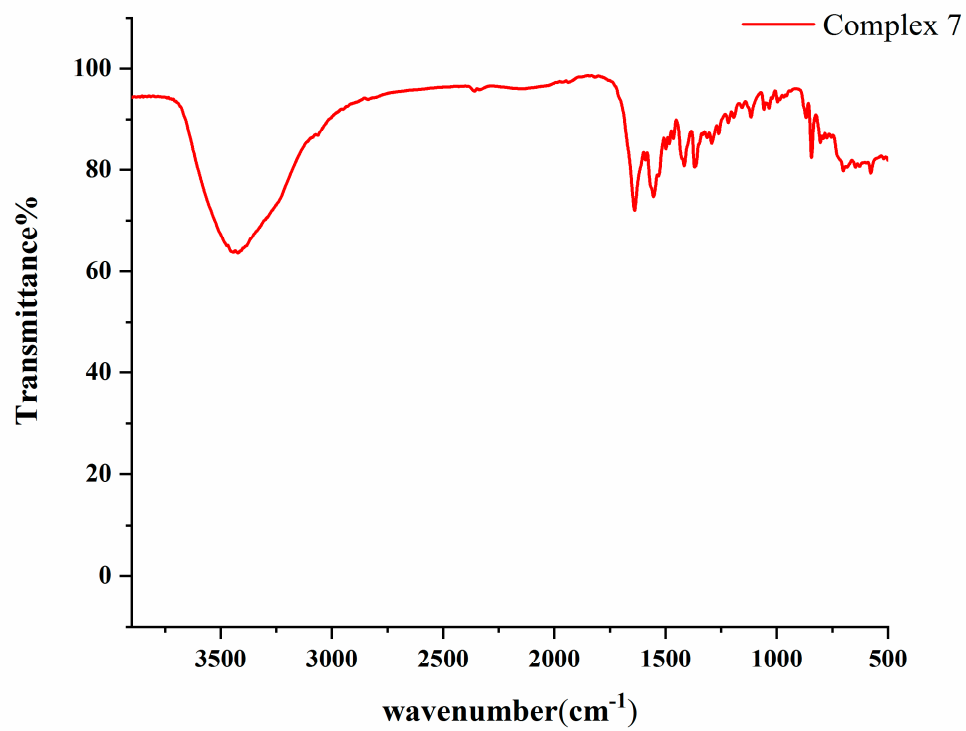

(g)

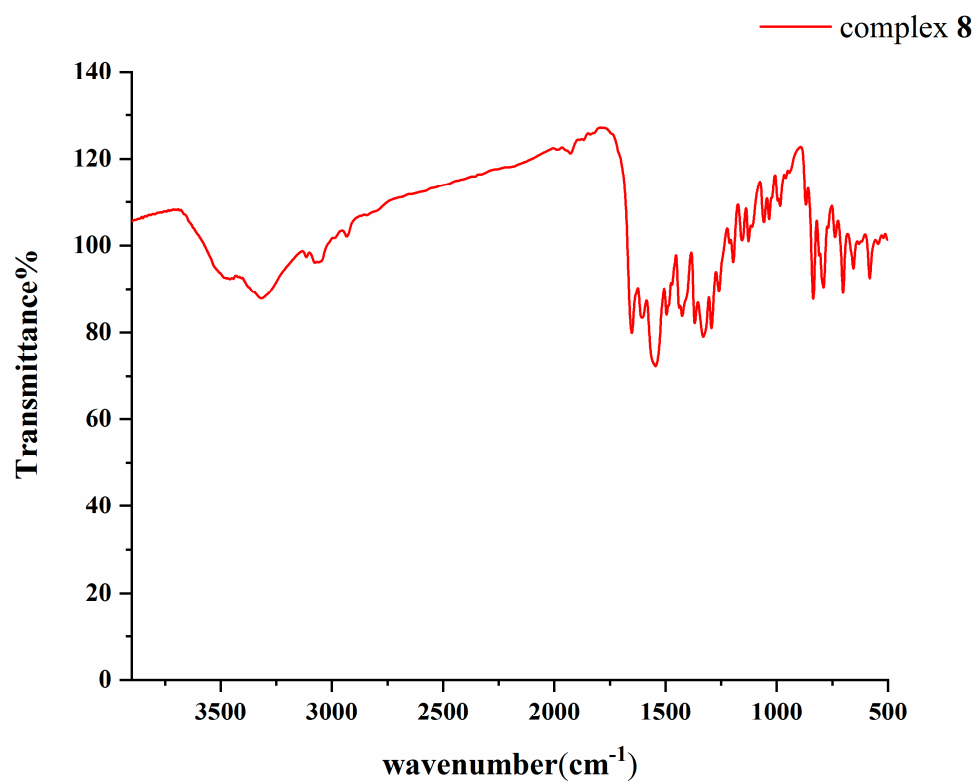

(h)

**Figure S26.** FTIR spectra of complex (a) 1, (b) 2, (c) 3, (d) 4, (e) 5, (f) 6, (g) 7 and (h) 8.

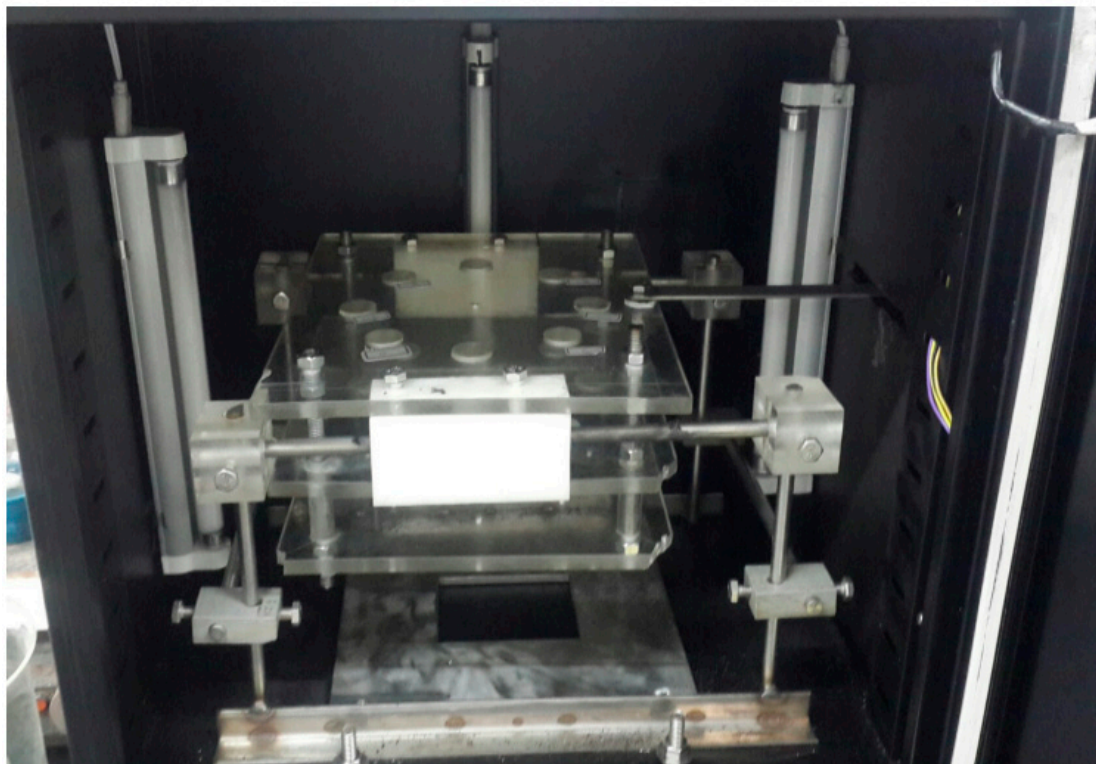

**Figure S27.** A photograph showing the internal side of a black photodegradation box.
